# Supplementary material
Source: HighWire-hosted journal article supplement (https://bmjopen.bmj.com/content/8/5/e019922)
Supplement: inline-supplementary-material-3 [file inline-supplementary-material-3.pdf]

**SUPPLEMENTARY FILE 3:****Equity and intrapartum care by skilled birth attendant globally: search strategy for PubMed/Medline and the Cochrane Database of Systematic Reviews****1. Pubmed / MEDLINE search**

| # | Section             | Search Terms                                                                                                                                                                                                                                                                                                                                                                                                                                                                                                                                                                                                                                                                                                                                                                                                                                                                                                                                                                                                                                                                                                                                                                                                                                                                                                                                                                                                                                                                                                                                                                                                                                                    |
|---|---------------------|-----------------------------------------------------------------------------------------------------------------------------------------------------------------------------------------------------------------------------------------------------------------------------------------------------------------------------------------------------------------------------------------------------------------------------------------------------------------------------------------------------------------------------------------------------------------------------------------------------------------------------------------------------------------------------------------------------------------------------------------------------------------------------------------------------------------------------------------------------------------------------------------------------------------------------------------------------------------------------------------------------------------------------------------------------------------------------------------------------------------------------------------------------------------------------------------------------------------------------------------------------------------------------------------------------------------------------------------------------------------------------------------------------------------------------------------------------------------------------------------------------------------------------------------------------------------------------------------------------------------------------------------------------------------|
| 1 | Childbirth          | “parturition”[MeSH] OR “Delivery, Obstetric”[MeSH] OR “Perinatal Care”[MeSH] OR “Pregnancy Outcome”[MeSH] OR “Pregnancy Complications”[MeSH] OR “Labor, Obstetric”[MeSH] OR “Obstetrics”[MeSH] OR “Postpartum Period”[MeSH] OR “Maternal Health Services”[MeSH] OR “Women's Health Services”[Mesh] OR “Reproductive Health Services”[Mesh] OR “Pregnant Women”[Mesh] OR “Pregnancy”[Mesh] OR “Maternal Death”[Mesh] OR “Maternal-Fetal Relations”[Mesh] OR “Maternal Exposure”[Mesh] OR “Maternal Mortality”[Mesh] OR “Maternal Behavior”[Mesh] OR “maternal behaviour”[MeSH] OR “pregnant”[TIAB] OR “pregnancy”[TIAB] OR “Maternity”[TIAB] OR “perinatal”[TIAB] OR “peri-natal”[TIAB] OR “peri natal”[TIAB] OR “Postnatal”[TIAB] OR “post natal”[TIAB] OR “post-natal”[TIAB] OR “ante natal”[TIAB] OR “antenatal”[TIAB] OR “ante-natal”[TIAB] OR “Postpartum”[TIAB] OR “Post partum”[TIAB] OR “Post-partum”[TIAB] OR “puerperium”[TIAB] OR “childbirth care”[TIAB] OR “childbirth”[TIAB] OR “birth”[TIAB] OR “intrapartum”[TIAB] OR (labour[TI] AND delivery[TI]) OR (labor[TI] AND delivery[TI]) OR “maternal health”[TIAB] OR “maternal and child health”[TIAB] OR “maternity care”[TIAB] OR “c-section”[TIAB] OR “caesarean”[TIAB] OR “cesarean”[TIAB] OR “caesarean section”[TIAB] OR “cesarean section”[TIAB] OR “obstetric surgery”[TIAB] OR “signal functions”[TIAB] OR “obstetric interventions”[TIAB] OR “emergency obstetric care”[TIAB] OR “emergency obstetric”[TIAB] OR “emergency obstetrics”[TIAB] OR “EmOC”[TIAB] OR “emergency newborn care”[TIAB] OR “essential obstetric care”[TIAB] OR “vaginal delivery”[TIAB] OR “normal delivery”[TIAB] |
| 2 | Cadre/Facility Name | “Health Personnel”[MeSH] OR Midwifery[MeSH] OR Obstetric Nursing[MeSH] OR “Professional Practice”[MeSH] OR “Emergency Responders”[MeSH] OR “Health Occupations”[Mesh] OR “Allied Health Occupations”[Mesh] OR “Students, Health Occupations”[Mesh] OR “Schools, Health Occupations”[Mesh] OR “Health Manpower”[Mesh] OR “health auxiliary”[TIAB] OR “health care manpower”[TIAB] OR “hospital personnel”[TIAB] OR “medical personnel”[TIAB] OR “health care personnel”[TIAB] OR “nursing home personnel”[TIAB] OR “paramedical personnel”[TIAB] OR “Health care workers”[TIAB] OR “Health care worker”[TIAB] OR “Medical Staff”[TIAB] OR “medical personnel”[TIAB] OR “General Practitioners”[TIAB] OR “General Practitioner”[TIAB] OR Caregiver*[TIAB] OR Nurses[TIAB] OR Nurse[TIAB] OR Midwife[TIAB] OR midwives[TIAB] OR midwife[TIAB] OR “Nursing Staff”[TIAB] OR “nurse midwife”[TIAB] OR “nurse midwives”[TIAB] OR “nurse-midwife”[TIAB] OR “nurse-midwives”[TIAB] OR auxiliary[TIAB] OR “Medical students”[TIAB] OR “Nursing students”[TIAB] OR (health*[TI] AND worker*[TI]) OR “Community Health Workers”[TIAB] OR “Community Health Worker”[TIAB] OR “Dental Staff”[TIAB] OR doctor[TIAB] OR doctors[TIAB] OR obstetrician[TIAB] OR obstetricians[TIAB] OR “skilled health                                                                                                                                                                                                                                                                                                                                                                           |

|   |        |                                                                                                                                                                                                                                                                                                                                                                                                                                                                                                                                                                                                                                                                                                                                                                                                                                                                                                                                                                                                                                                                                                                                                                                                                                                                                                                                                                                                                                                                                                                                                                                                                                                                                                                                                                                                                                                                                                                                                                                                                                                                                                                                                                                                                                                                                                                                                                                                                                                                                                                                                                                                                                                                                                                                                                                                                                                                                                                                                                                                                                                                                                                                                                                                                          |
|---|--------|--------------------------------------------------------------------------------------------------------------------------------------------------------------------------------------------------------------------------------------------------------------------------------------------------------------------------------------------------------------------------------------------------------------------------------------------------------------------------------------------------------------------------------------------------------------------------------------------------------------------------------------------------------------------------------------------------------------------------------------------------------------------------------------------------------------------------------------------------------------------------------------------------------------------------------------------------------------------------------------------------------------------------------------------------------------------------------------------------------------------------------------------------------------------------------------------------------------------------------------------------------------------------------------------------------------------------------------------------------------------------------------------------------------------------------------------------------------------------------------------------------------------------------------------------------------------------------------------------------------------------------------------------------------------------------------------------------------------------------------------------------------------------------------------------------------------------------------------------------------------------------------------------------------------------------------------------------------------------------------------------------------------------------------------------------------------------------------------------------------------------------------------------------------------------------------------------------------------------------------------------------------------------------------------------------------------------------------------------------------------------------------------------------------------------------------------------------------------------------------------------------------------------------------------------------------------------------------------------------------------------------------------------------------------------------------------------------------------------------------------------------------------------------------------------------------------------------------------------------------------------------------------------------------------------------------------------------------------------------------------------------------------------------------------------------------------------------------------------------------------------------------------------------------------------------------------------------------------------|
|   |        | <p>provider"[TIAB] OR "skilled health providers"[TIAB] OR "skilled attendant"[TIAB] OR "skilled attendants"[TIAB] OR "skilled birth attendant"[TIAB] OR "skilled birth attendants"[TIAB] OR "skilled health"[TIAB] OR "skilled assistance"[TIAB] "skilled assistant"[TIAB] OR "skilled assistants"[TIAB] OR "skilled care"[TIAB] OR "skilled manpower"[TIAB] OR "skilled delivery"[TIAB] OR "skilled staff"[TIAB] OR "skilled person"[TIAB] OR "skilled birth personnel"[TIAB] OR "skilled health workers"[TIAB] OR "skilled health care worker"[TIAB] OR "skilled health care workers"[TIAB] OR "assistance at delivery"[TIAB] OR "assistance at birth"[TIAB] OR "attendant"[TIAB] OR "SAB"[TIAB] OR "SBA"[TIAB] or cadre[TIAB]or cadres[TIAB] OR "health care worker"[TIAB] OR "health care person"[TIAB] OR "health person"[TIAB] OR "health care provider"[TIAB] OR "care provider"[TIAB] OR "care providers"[TIAB] OR "health provider"[TIAB] OR "health providers"[TIAB] OR "health aide"[TIAB] OR "health aides"[TIAB] OR "traditional birth attendant"[TIAB] OR "birth attendant"[TIAB] OR "community birth attendant"[TIAB] OR "health assistant"[TIAB] OR "feldsher"[TIAB] OR "clinical officer"[TIAB] OR "clinical officers"[TIAB] OR "medical officer"[TIAB] OR "medical officers"[TIAB] OR "assistant medical officers"[TIAB] OR "Mother and Child Health Aides"[TIAB] OR "Mother and Child Health Aide"[TIAB] OR "MCHA"[TIAB] OR "mid-level provider"[TIAB] OR "mid-level cadre"[TIAB] OR "mid-level cadres"[TIAB] OR "mid-level healthcare workers"[TIAB] OR "mid-level health care workers"[TIAB] OR "mid-level health workers"[TIAB] OR "community-based skilled birth attendants"[TIAB] OR "community-based skilled birth attendant"[TIAB] OR "community based skilled birth attendants"[TIAB] OR "community based skilled birth attendant"[TIAB] OR "health visitor"[TIAB] or (health*[TI] AND worker*[TI]) OR "fieldworker"[TIAB] OR "task shifting"[TIAB] OR "nonphysicians"[TIAB] OR "non-physician clinicians"[TIAB] OR "non-physician"[TIAB] OR "clinician"[TIAB] OR "clinicians"[TIAB] OR "physicians"[MeSH] OR "ambulatory care facilities"[MeSH] OR "hospitals"[MeSH] OR "rural health services"[MeSH] OR "community health services"[MeSH] OR "hospitalization"[MeSH] OR "hospitalisation"[MeSH] OR "home birth"[TIAB] or "home births"[TIAB] OR "health facilities"[MeSH] OR "home childbirth"[MeSH] OR "maternal health services"[MeSH] OR "emergency medical services"[MeSH] OR "hospitals public"[MeSH] OR "community health services"[MeSH] OR "birthing centers"[MeSH] OR "birthing centres"[MeSH] OR "delivery of health care"[MeSH] OR "delivery rooms"[MeSH] OR "emergency service hospital"[MeSH] OR "hospitals teaching"[MeSH] OR "medical staff hospital"[MeSH] OR "hospitals university"[MeSH] OR "outpatient clinics hospital"[MeSH] OR "hospitals public"[MeSH] OR "personnel hospital"[MeSH] OR "hospitals general"[MeSH] OR "nursing service hospital"[MeSH] OR "academic medical centers"[MeSH] OR academic medical centres"[MeSH] OR "hospital unit"[MeSH] OR "community health service"[MeSH] OR "doulas"[MeSH Terms] OR "doulas"[All Fields] OR "doula"[All Fields]</p> |
| 3 | Equity | <p>"Health Status Disparities"[Mesh] OR "Health Equity"[Mesh] OR "Healthcare Disparities"[Mesh] OR "Social Justice"[Mesh] OR "Social responsibility"[Mesh] OR "social values"[Mesh] OR "Human Rights"[Mesh] OR "Socioeconomic Factors"[Mesh] OR "Health Status Indicators"[Mesh] OR "Maternal Welfare"[Mesh] OR "Human Rights"[Mesh] OR "Health Policy"[Mesh]) OR "Health Status"[Mesh] OR "Social Determinants of Health"[Mesh] OR "Health care reform"[MeSH] OR "Quality of health care"[Mesh] OR "Public health"[Mesh] OR</p>                                                                                                                                                                                                                                                                                                                                                                                                                                                                                                                                                                                                                                                                                                                                                                                                                                                                                                                                                                                                                                                                                                                                                                                                                                                                                                                                                                                                                                                                                                                                                                                                                                                                                                                                                                                                                                                                                                                                                                                                                                                                                                                                                                                                                                                                                                                                                                                                                                                                                                                                                                                                                                                                                         |

|   |                      |                                                                                                                                                                                                                                                                                                                                                                                                                                                                                                                                                                                                                                                                                                                                                                                                                                                                                                                                                                                                                                                                                                                                                                                                                                                                                                                                                                                                                                                                                                                                                                                                                                                                                                                                                                                                                                                                                                                                                                                                                                                                                                                                                                                                                                                                                                                                                                                                                                                                                                                                                                                                                                                                                                                                                                                                                                                                                                                                                                                                                                                                                                                                                                                                                                                                                                                                                                                                                                                                                                                                                                        |
|---|----------------------|------------------------------------------------------------------------------------------------------------------------------------------------------------------------------------------------------------------------------------------------------------------------------------------------------------------------------------------------------------------------------------------------------------------------------------------------------------------------------------------------------------------------------------------------------------------------------------------------------------------------------------------------------------------------------------------------------------------------------------------------------------------------------------------------------------------------------------------------------------------------------------------------------------------------------------------------------------------------------------------------------------------------------------------------------------------------------------------------------------------------------------------------------------------------------------------------------------------------------------------------------------------------------------------------------------------------------------------------------------------------------------------------------------------------------------------------------------------------------------------------------------------------------------------------------------------------------------------------------------------------------------------------------------------------------------------------------------------------------------------------------------------------------------------------------------------------------------------------------------------------------------------------------------------------------------------------------------------------------------------------------------------------------------------------------------------------------------------------------------------------------------------------------------------------------------------------------------------------------------------------------------------------------------------------------------------------------------------------------------------------------------------------------------------------------------------------------------------------------------------------------------------------------------------------------------------------------------------------------------------------------------------------------------------------------------------------------------------------------------------------------------------------------------------------------------------------------------------------------------------------------------------------------------------------------------------------------------------------------------------------------------------------------------------------------------------------------------------------------------------------------------------------------------------------------------------------------------------------------------------------------------------------------------------------------------------------------------------------------------------------------------------------------------------------------------------------------------------------------------------------------------------------------------------------------------------------|
|   |                      | <p>             "Global health"[Mesh] OR "Sex factors"[Mesh] OR "sex distribution"[Mesh] OR<br/>             "Public policy"[Mesh] OR "Women s rights"[Mesh] OR "economics"[Mesh] OR<br/>             "age factors"[Mesh] OR "age distribution"[Mesh] OR "adolescent"[Mesh] OR<br/>             "Young adult"[Mesh] OR "policy making"[Mesh] OR "resource allocation"[Mesh]<br/>             OR "financing government"[Mesh] OR "insurance"[Mesh] OR "risk factors"[Mesh]<br/>             OR "risk assessment"[Mesh] OR "prejudice"[Mesh] OR "mortality"[Mesh] OR<br/>             "quality of life"[Mesh] OR "medical ethics" OR "decision making"[Mesh] OR moral<br/>             obligations"[Mesh] OR "social welfare"[Mesh] OR "patient advocacy"[Mesh] OR<br/>             "cultural diversity"[Mesh] OR "health priorities"[Mesh] OR "socioeconomic<br/>             factors"[All Fields] OR "inequality"[All Fields] OR "inequalities"[All Fields] OR<br/>             equity[All Fields] OR inequity[All Fields] OR inequities[All Fields] OR socio-<br/>             economic[All Fields] OR ("unmet"[All Fields] AND "need"[All Fields]) OR<br/>             "barrier"[All Fields] OR "income"[MeSH Terms] OR "income"[All Fields] OR<br/>             "socioeconomics"[All Fields]) OR "geographic"[All Fields] OR "exclusion"[All Fields]<br/>             OR "poverty"[MeSH Terms] OR "poverty"[All Fields] OR "Poverty Areas"[Mesh] OR<br/>             "Working Poor"[Mesh] OR "Vulnerable Populations"[Mesh] OR "vulnerability"[All<br/>             Fields] OR "marginalized"[All Fields] OR "marginalised"[All Fields] OR<br/>             "vulnerable"[All Fields] OR "marginalization"[All Fields] OR "marginalisation"[All<br/>             Fields] OR "social distance"[MeSH Terms] OR "social distance"[All Fields] OR "social<br/>             exclusion"[All Fields] OR (social[All Fields] AND stratification[All Fields]) OR<br/>             gradient[All Fields] OR determinant[All Fields] OR predictor[All Fields] OR<br/>             propension[All Fields] OR ("risk factors"[MeSH Terms] OR "risk factors"[All Fields]<br/>             OR "risk factor"[All Fields]) OR residence[All Fields] OR location[All Fields] OR<br/>             ("ethnology"[Subheading] OR "ethnology"[All Fields] OR "ethnicity"[All Fields] OR<br/>             "ethnology"[MeSH Terms] OR "ethnicity"[All Fields] OR "ethnic groups"[MeSH<br/>             Terms] OR "ethnic groups"[All Fields]) OR ("emigration and immigration"[MeSH<br/>             Terms] OR ("emigration"[All Fields] AND "immigration"[All Fields]) OR "emigration<br/>             and immigration"[All Fields] OR "emigrants and immigrants"[Mesh] OR "minority<br/>             groups"[Mesh] OR "developing countries"[MeSH Terms] OR "social class"[Mesh]<br/>             OR "health care rationing"[Mesh] OR "insurance care"[Mesh] OR "politics"[Mesh]<br/>             OR "health expenditures"[Mesh] OR "demography"[Mesh] OR "health care<br/>             costs"[Mesh] OR "urban population"[Mesh] OR "rural population"[Mesh] OR<br/>             "universal coverage"[Mesh] OR "health resources"[Mesh] OR<br/>             "employment"[Mesh] OR "educational status"[Mesh] OR "residence<br/>             characteristics"[Mesh] OR "time factors"[Mesh] OR "risk assessment"[Mesh] OR<br/>             "religion and medicine"[Mesh] OR "cultural characteristics"[Mesh] OR "cultural<br/>             diversity"[Mesh] OR "Poverty"[Mesh]           </p> |
| 4 | Access/<br>Provision | <p>             "Health Care Quality, Access, and Evaluation"[Mesh] OR "Health Services<br/>             Accessibility"[Mesh] OR "Health Promotion"[Mesh] OR "Culturally Competent<br/>             Care"[Mesh] OR "Health Resources/economics"[MeSH Terms] OR "Maternal<br/>             Health Services/standards"[MAJR] OR "Maternal Health<br/>             Services/economics"[MeSH Terms] OR "Quality of Health Care/economics"[MeSH<br/>             Terms] OR "Quality of Health Care/standards"[MAJR] OR "Maternal Health<br/>             Services/utilization"[MeSH Terms] OR "Prenatal Care/utilization"[MeSH Terms] OR<br/>             "Prenatal Care/utilisation"[MeSH] OR "Urban Population/statistics and numerical<br/>             data"[MAJR] OR "Rural Population/statistics and numerical data"[MAJR] OR<br/>             "Medically Underserved Area"[MeSH Terms] OR "Prenatal Care/standards"[MAJR]<br/>             OR "Health Services Needs and Demand"[MeSH Terms] OR "delivery of health           </p>                                                                                                                                                                                                                                                                                                                                                                                                                                                                                                                                                                                                                                                                                                                                                                                                                                                                                                                                                                                                                                                                                                                                                                                                                                                                                                                                                                                                                                                                                                                                                                                                                                                                                                                                                                                                                                                                                                                                                                                                                                                                                                                                                                                                                                                                                                                                                                                                                                                                                                                                   |

|   |                                                                              |                                                                                                                                                                                                                                                                                                                                                                                                                                                                                                                                                                                                                                                                                                                                                                                                                                                                                                                                                                                                                                                                                                                                                                                                                                                                                                                                         |
|---|------------------------------------------------------------------------------|-----------------------------------------------------------------------------------------------------------------------------------------------------------------------------------------------------------------------------------------------------------------------------------------------------------------------------------------------------------------------------------------------------------------------------------------------------------------------------------------------------------------------------------------------------------------------------------------------------------------------------------------------------------------------------------------------------------------------------------------------------------------------------------------------------------------------------------------------------------------------------------------------------------------------------------------------------------------------------------------------------------------------------------------------------------------------------------------------------------------------------------------------------------------------------------------------------------------------------------------------------------------------------------------------------------------------------------------|
|   |                                                                              | care"[MeSH Terms] OR "Health services needs and demand"[MeSH Terms] OR "Primary health care"[Mesh] OR "patient acceptance of health care"[Mesh] OR "Health knowledge attitudes practice"[Mesh] OR "health promotion"[Mesh] OR "delivery of health care"[Mesh] OR "health behavior"[Mesh] OR "health behaviour"[MeSH] OR "attitude to health"[Mesh] OR "personal autonomy"[Mesh] OR "attitude of health personnel"[Mesh] OR access[All Fields] OR accessibility[All Fields] OR "utilization"[Subheading] OR "utilisation"[Subheading] OR "utilization"[All Fields] OR "utilisation"[All Fields] OR "use"[All Fields] OR "coverage"[All Fields] OR "health services"[MeSH Terms] OR "access to health care"[All Fields] OR "delivery of health care"[MeSH Terms] OR "health services"[All Fields] OR "health facilities"[All Fields] OR "obstetric delivery"[All Fields] OR "delivery"[All Fields] OR "health care surveys"[Mesh] OR "needs assessment"[Mesh] OR "health care costs"[Mesh] OR "mental health services"[Mesh] OR "mental disorders"[Mesh] OR "health services research"[Mesh] OR "outcome assessment health care"[Mesh] OR "quality assurance health care"[Mesh] OR "rural health services"[Mesh] OR "social support"[Mesh] OR "insurance coverage"[Mesh] OR "community health services"[Mesh] OR "health education"[Mesh] |
| 5 | 1 AND 2 AND 3 AND 4 AND Filter: Publication date from 2004/01/01 to present. |                                                                                                                                                                                                                                                                                                                                                                                                                                                                                                                                                                                                                                                                                                                                                                                                                                                                                                                                                                                                                                                                                                                                                                                                                                                                                                                                         |

## 2. Cochrane Central search

| ID  | Search                                                                                          | Hits  |
|-----|-------------------------------------------------------------------------------------------------|-------|
| #1  | MeSH descriptor: [Parturition] explode all trees                                                | 266   |
| #2  | MeSH descriptor: [Delivery, Obstetric] explode all trees                                        | 4852  |
| #3  | MeSH descriptor: [Pregnancy] explode all trees                                                  | 5608  |
| #4  | MeSH descriptor: [Maternal-Fetal Relations] explode all trees                                   | 14    |
| #5  | MeSH descriptor: [Maternal Mortality] explode all trees                                         | 124   |
| #6  | MeSH descriptor: [Maternal Health Services] explode all trees                                   | 1994  |
| #7  | MeSH descriptor: [Postpartum Period] explode all trees                                          | 1349  |
| #8  | MeSH descriptor: [Cesarean Section] explode all trees                                           | 2839  |
| #9  | MeSH descriptor: [Emergency Medical Services] explode all trees                                 | 3652  |
| #10 | MeSH descriptor: [Perinatal Mortality] explode all trees                                        | 45    |
| #11 | MeSH descriptor: [Vacuum Extraction, Obstetrical] explode all trees                             | 81    |
| #12 | MeSH descriptor: [Obstetrical Forceps] explode all trees                                        | 53    |
| #13 | MeSH descriptor: [Vaginal Birth after Cesarean] explode all trees                               | 58    |
| #14 | MeSH descriptor: [Labor, Obstetric] explode all trees                                           | 1945  |
| #15 | MeSH descriptor: [Obstetric Labor Complications] explode all trees                              | 2697  |
| #16 | MeSH descriptor: [Prenatal Care] explode all trees                                              | 1302  |
| #17 | MeSH descriptor: [Prenatal Diagnosis] explode all trees                                         | 1071  |
| #18 | "maternal mortality":ti,ab,kw (Word variations have been searched)                              | 435   |
| #19 | delivery:ti,ab,kw (Word variations have been searched)                                          | 25934 |
| #20 | pregnancy:ti,ab,kw (Word variations have been searched)                                         | 33283 |
| #21 | "maternal health services":ti,ab,kw (Word variations have been searched)                        | 247   |
| #22 | vaginal delivery:ti,ab,kw (Word variations have been searched)                                  | 2532  |
| #23 | postpartum or prenatal or antenatal or antepartum:ti,ab,kw (Word variations have been searched) | 10362 |
| #24 | "birth":ti,ab,kw (Word variations have been searched)                                           | 16054 |
| #25 | obstetrics:ti,ab,kw (Word variations have been searched)                                        | 2287  |

|     |                                                                                                      |       |  |
|-----|------------------------------------------------------------------------------------------------------|-------|--|
| #26 | c*sarean section:ti,ab,kw (Word variations have been searched)                                       | 6986  |  |
| #27 | "emergency obstetric*":ti,ab,kw (Word variations have been searched)                                 | 43    |  |
| #28 | lab*r:ti,ab,kw (Word variations have been searched)                                                  | 10228 |  |
| #29 | childbirth*:ti,ab,kw (Word variations have been searched)                                            | 1739  |  |
| #30 | {or #1-#29}                                                                                          | 69723 |  |
| #31 | MeSH descriptor: [Health Personnel] explode all trees                                                | 7620  |  |
| #32 | MeSH descriptor: [Community Health Workers] explode all trees                                        | 339   |  |
| #33 | MeSH descriptor: [Nurses] explode all trees                                                          | 1158  |  |
| #34 | MeSH descriptor: [Allied Health Personnel] explode all trees                                         | 978   |  |
| #35 | MeSH descriptor: [Midwifery] explode all trees                                                       | 324   |  |
| #36 | MeSH descriptor: [Emergency Responders] explode all trees                                            | 251   |  |
| #37 | MeSH descriptor: [Allied Health Occupations] explode all trees                                       | 1000  |  |
| #38 | MeSH descriptor: [Obstetric Nursing] explode all trees                                               | 41    |  |
| #39 | MeSH descriptor: [Health Occupations] explode all trees                                              | 20897 |  |
| #40 | MeSH descriptor: [Skilled Nursing Facilities] explode all trees                                      | 60    |  |
| #41 | MeSH descriptor: [Physicians] explode all trees                                                      | 1686  |  |
| #42 | MeSH descriptor: [Nurse Clinicians] explode all trees                                                | 153   |  |
| #43 | MeSH descriptor: [Ambulatory Care Facilities] explode all trees                                      | 1886  |  |
| #44 | MeSH descriptor: [Maternal-Child Health Centers] explode all trees                                   | 49    |  |
| #45 | MeSH descriptor: [Rural Health Services] explode all trees                                           | 336   |  |
| #46 | MeSH descriptor: [Community Health Centers] explode all trees                                        | 572   |  |
| #47 | MeSH descriptor: [Birthing Centers] explode all trees                                                | 23    |  |
| #48 | MeSH descriptor: [Hospitals] explode all trees                                                       | 3658  |  |
| #49 | nurse* or doctor* or physician* or midwife or midwives:ti,ab,kw (Word variations have been searched) | 41259 |  |
| #50 | "health worker*":ti,ab,kw (Word variations have been searched)                                       | 1215  |  |
| #51 | "birth attendant*":ti,ab,kw (Word variations have been searched)                                     | 127   |  |
| #52 | "skilled attendant*":ti,ab,kw (Word variations have been searched)                                   | 5     |  |
| #53 | "skilled assistant*":ti,ab,kw (Word variations have been searched)                                   | 1     |  |
| #54 | obstetrician*:ti,ab,kw (Word variations have been searched)                                          | 921   |  |
| #55 | practitioner*:ti,ab,kw (Word variations have been searched)                                          | 3     |  |
| #56 | "clinical officer*":ti,ab,kw (Word variations have been searched)                                    | 23    |  |
| #57 | birth centre* or birth center*:ti,ab,kw (Word variations have been searched)                         | 2023  |  |
| #58 | health centre* or health center*:ti,ab,kw (Word variations have been searched)                       | 19565 |  |
| #59 | "health facilit*":ti,ab,kw (Word variations have been searched)                                      | 647   |  |
| #60 | "health provider*":ti,ab,kw (Word variations have been searched)                                     | 253   |  |
| #61 | "health institution*":ti,ab,kw (Word variations have been searched)                                  | 61    |  |
| #62 | clinic?:ti,ab,kw (Word variations have been searched)                                                | 9489  |  |
| #63 | hospital?:ti,ab,kw (Word variations have been searched)                                              | 15683 |  |
| #64 | "birth centre?" or "birth center?":ti,ab,kw (Word variations have been searched)                     | 31    |  |
| #65 | {or #31-#64}                                                                                         | 96129 |  |
| #66 | MeSH descriptor: [Health Equity] explode all trees                                                   | 2     |  |
| #67 | MeSH descriptor: [Human Rights] explode all trees                                                    | 1262  |  |
| #68 | MeSH descriptor: [Social Justice] explode all trees                                                  | 60    |  |
| #69 | MeSH descriptor: [Health Status Disparities] explode all trees                                       | 142   |  |
| #70 | MeSH descriptor: [Healthcare Disparities] explode all trees                                          | 176   |  |
| #71 | MeSH descriptor: [Social Responsibility] explode all trees                                           | 87    |  |
| #72 | MeSH descriptor: [Human Rights] explode all trees                                                    | 1262  |  |
| #73 | MeSH descriptor: [Social Values] explode all trees                                                   | 164   |  |
| #74 | MeSH descriptor: [Socioeconomic Factors] explode all trees                                           | 8582  |  |
| #75 | MeSH descriptor: [Health Status Indicators] explode all trees                                        | 19398 |  |
| #76 | MeSH descriptor: [Health Policy] explode all trees                                                   | 724   |  |
| #77 | MeSH descriptor: [Social Determinants of Health] explode all trees                                   | 11    |  |

|      |                                                                                  |        |  |
|------|----------------------------------------------------------------------------------|--------|--|
| #78  | MeSH descriptor: [Quality of Health Care] explode all trees                      | 424055 |  |
| #79  | MeSH descriptor: [Public Health] explode all trees                               | 408036 |  |
| #80  | MeSH descriptor: [Global Health] explode all trees                               | 212    |  |
| #81  | MeSH descriptor: [Sex Factors] explode all trees                                 | 5525   |  |
| #82  | MeSH descriptor: [Sex Distribution] explode all trees                            | 783    |  |
| #83  | MeSH descriptor: [Public Policy] explode all trees                               | 784    |  |
| #84  | MeSH descriptor: [Women's Rights] explode all trees                              | 6      |  |
| #85  | MeSH descriptor: [Age Factors] explode all trees                                 | 9847   |  |
| #86  | MeSH descriptor: [Age Distribution] explode all trees                            | 845    |  |
| #87  | MeSH descriptor: [Adolescent] explode all trees                                  | 90431  |  |
| #88  | MeSH descriptor: [Young Adult] explode all trees                                 | 266    |  |
| #89  | MeSH descriptor: [Policy Making] explode all trees                               | 86     |  |
| #90  | MeSH descriptor: [Resource Allocation] explode all trees                         | 145    |  |
| #91  | MeSH descriptor: [Social Welfare] explode all trees                              | 845    |  |
| #92  | MeSH descriptor: [Patient Advocacy] explode all trees                            | 75     |  |
| #93  | MeSH descriptor: [Socioeconomic Factors] explode all trees                       | 8582   |  |
| #94  | MeSH descriptor: [Income] explode all trees                                      | 931    |  |
| #95  | MeSH descriptor: [Poverty] explode all trees                                     | 1377   |  |
| #96  | MeSH descriptor: [Poverty Areas] explode all trees                               | 240    |  |
| #97  | MeSH descriptor: [Vulnerable Populations] explode all trees                      | 220    |  |
| #98  | MeSH descriptor: [Social Distance] explode all trees                             | 113    |  |
| #99  | MeSH descriptor: [Risk Factors] explode all trees                                | 24525  |  |
| #100 | MeSH descriptor: [Ethnic Groups] explode all trees                               | 3695   |  |
| #101 | MeSH descriptor: [Emigration and Immigration] explode all trees                  | 79     |  |
| #102 | MeSH descriptor: [Minority Groups] explode all trees                             | 316    |  |
| #103 | MeSH descriptor: [Developing Countries] explode all trees                        | 1011   |  |
| #104 | MeSH descriptor: [Social Class] explode all trees                                | 589    |  |
| #105 | MeSH descriptor: [Health Care Rationing] explode all trees                       | 77     |  |
| #106 | MeSH descriptor: [Insurance, Long-Term Care] explode all trees                   | 5      |  |
| #107 | MeSH descriptor: [Politics] explode all trees                                    | 48     |  |
| #108 | MeSH descriptor: [Health Expenditures] explode all trees                         | 332    |  |
| #109 | MeSH descriptor: [Urban Population] explode all trees                            | 1204   |  |
| #110 | MeSH descriptor: [Rural Population] explode all trees                            | 1249   |  |
| #111 | MeSH descriptor: [Universal Coverage] explode all trees                          | 7      |  |
| #112 | MeSH descriptor: [Health Resources] explode all trees                            | 593    |  |
| #113 | MeSH descriptor: [Educational Status] explode all trees                          | 1347   |  |
| #114 | MeSH descriptor: [Residence Characteristics] explode all trees                   | 1179   |  |
| #115 | MeSH descriptor: [Time Factors] explode all trees                                | 59415  |  |
| #116 | MeSH descriptor: [Religion and Medicine] explode all trees                       | 59     |  |
| #117 | MeSH descriptor: [Cultural Characteristics] explode all trees                    | 157    |  |
| #118 | MeSH descriptor: [Cultural Diversity] explode all trees                          | 83     |  |
| #119 | equit* or inequit*:ti,ab,kw (Word variations have been searched)                 | 544    |  |
| #120 | equal* or unequal*:ti,ab,kw (Word variations have been searched)                 | 32042  |  |
| #121 | socio-economic? or socioeconomic?:ti,ab,kw (Word variations have been searched)  | 559    |  |
| #122 | "unmet need?":ti,ab,kw (Word variations have been searched)                      | 232    |  |
| #123 | barrier?:ti,ab,kw (Word variations have been searched)                           | 4561   |  |
| #124 | determinant?:ti,ab,kw (Word variations have been searched)                       | 3279   |  |
| #125 | geographic:ti,ab,kw (Word variations have been searched)                         | 1798   |  |
| #126 | "risk factor?":ti,ab,kw (Word variations have been searched)                     | 38428  |  |
| #127 | "determinant* of health":ti,ab,kw (Word variations have been searched)           | 100    |  |
| #128 | marginali*ation:ti,ab,kw (Word variations have been searched)                    | 22     |  |
| #129 | {or #66-#128}                                                                    | 498594 |  |
| #130 | MeSH descriptor: [Health Care Quality, Access, and Evaluation] explode all trees | 430323 |  |

|      |                                                                                 |        |  |
|------|---------------------------------------------------------------------------------|--------|--|
| #131 | MeSH descriptor: [Health Services Accessibility] explode all trees              | 1084   |  |
| #132 | MeSH descriptor: [Health Promotion] explode all trees                           | 5485   |  |
| #133 | MeSH descriptor: [Culturally Competent Care] explode all trees                  | 30     |  |
| #134 | MeSH descriptor: [Maternal Health Services] explode all trees                   | 1994   |  |
| #135 | MeSH descriptor: [Quality of Health Care] explode all trees                     | 424055 |  |
| #136 | MeSH descriptor: [Medically Underserved Area] explode all trees                 | 112    |  |
| #137 | MeSH descriptor: [Health Services Needs and Demand] explode all trees           | 532    |  |
| #138 | MeSH descriptor: [Delivery of Health Care] explode all trees                    | 45744  |  |
| #139 | MeSH descriptor: [Primary Health Care] explode all trees                        | 6730   |  |
| #140 | MeSH descriptor: [Patient Acceptance of Health Care] explode all trees          | 25535  |  |
| #141 | MeSH descriptor: [Health Knowledge, Attitudes, Practice] explode all trees      | 5020   |  |
| #142 | MeSH descriptor: [Health Promotion] explode all trees                           | 5485   |  |
| #143 | MeSH descriptor: [Health Behavior] explode all trees                            | 19176  |  |
| #144 | MeSH descriptor: [Attitude of Health Personnel] explode all trees               | 2095   |  |
| #145 | MeSH descriptor: [Attitude to Health] explode all trees                         | 31755  |  |
| #146 | MeSH descriptor: [Personal Autonomy] explode all trees                          | 170    |  |
| #147 | MeSH descriptor: [Health Services] explode all trees                            | 90269  |  |
| #148 | MeSH descriptor: [Health Services Accessibility] explode all trees              | 1084   |  |
| #149 | MeSH descriptor: [Rural Health Services] explode all trees                      | 336    |  |
| #150 | access:ti,ab,kw (Word variations have been searched)                            | 12815  |  |
| #151 | utili*ation:ti,ab,kw (Word variations have been searched)                       | 11183  |  |
| #152 | coverage:ti,ab,kw (Word variations have been searched)                          | 3228   |  |
| #153 | "health service?":ti,ab,kw (Word variations have been searched)                 | 10578  |  |
| #154 | {or #130-#153}                                                                  | 461529 |  |
| #155 | #30 and #65 and #129 and #154 Online Publication Date from Jan 2004 to Jun 2017 | 654    |  |
