# Supplementary material
Source: HighWire-hosted journal article supplement (https://bmjopen.bmj.com/content/8/5/e019922)
Supplement: inline-supplementary-material-4 [file inline-supplementary-material-4.pdf]

**SUPPLEMENTARY FILE 4:****Equity and intrapartum care by skilled birth attendant globally: data extraction form****Notes:**

- Please be consistent in the order and style used to enter information for each item.
- Please record missing data as unclear or missing in the study report.
- If an item is not applicable, please mark as NA.

***General information***

| <i>General Data</i>                    |                                                          |
|----------------------------------------|----------------------------------------------------------|
| 1. Study ID                            |                                                          |
| 2. Date form completed<br>(dd/mm/yy)   |                                                          |
| 3. Primary author                      |                                                          |
| 4. Name of reviewer                    |                                                          |
| 5. Study title                         |                                                          |
| 6. Year of publication                 |                                                          |
| 7. Journal                             |                                                          |
| 8. Country                             |                                                          |
| 9. Study funding source                |                                                          |
| 10. Conflict of interest<br>(reviewer) | <input type="checkbox"/> Yes <input type="checkbox"/> No |

### Study Eligibility

| Review of inclusion criteria |                                                                                                                                                                                     |                           |                          |                          |                                           |
|------------------------------|-------------------------------------------------------------------------------------------------------------------------------------------------------------------------------------|---------------------------|--------------------------|--------------------------|-------------------------------------------|
| Study characteristics        | Eligibility criteria                                                                                                                                                                | Eligibility criteria met? |                          |                          | Location in text or source (pg/fig/table) |
|                              |                                                                                                                                                                                     | Yes                       | No                       | Unclear                  |                                           |
| 1. Population                | Women who experienced childbirth within the scope of the specific study.                                                                                                            | <input type="checkbox"/>  | <input type="checkbox"/> | <input type="checkbox"/> |                                           |
| 2. Intervention              | Access to skilled care with SBA or institutional deliveries                                                                                                                         | <input type="checkbox"/>  | <input type="checkbox"/> | <input type="checkbox"/> |                                           |
| 3. Comparison                | Utilization of non-SBA birth attendants or traditional birth attendants at the time of delivery.                                                                                    | <input type="checkbox"/>  | <input type="checkbox"/> | <input type="checkbox"/> |                                           |
| 4. Outcome                   | Evaluation of inequity in access to SBA at the time of childbirth.                                                                                                                  | <input type="checkbox"/>  | <input type="checkbox"/> | <input type="checkbox"/> |                                           |
| 5. Study design              | All observational quantitative studies on human subjects (including but not limited to prospective and retrospective cohort studies, cross-sectional studies, mix-methods studies). | <input type="checkbox"/>  | <input type="checkbox"/> | <input type="checkbox"/> |                                           |
| 6. Context                   | All countries with health facility and/or community-based services offering childbirth care.                                                                                        | <input type="checkbox"/>  | <input type="checkbox"/> | <input type="checkbox"/> |                                           |
| 7. Results                   | Quantitative results of the association between potential determinants and access to SBA                                                                                            | <input type="checkbox"/>  | <input type="checkbox"/> | <input type="checkbox"/> |                                           |
| 8. Decision                  | <input type="checkbox"/> Include <input type="checkbox"/> Exclude                                                                                                                   |                           |                          |                          |                                           |
| 9. Reason for exclusion      |                                                                                                                                                                                     |                           |                          |                          |                                           |
| <b>Notes:</b><br><br>        |                                                                                                                                                                                     |                           |                          |                          |                                           |

**DO NOT PROCEED IF STUDY IS EXCLUDED FROM THIS REVIEW**

## Methods

| Study characteristics                                                 |                                                                                                                                                          |
|-----------------------------------------------------------------------|----------------------------------------------------------------------------------------------------------------------------------------------------------|
| 10. Aim of study                                                      |                                                                                                                                                          |
| 11. Study design                                                      | <input type="checkbox"/> cross-sectional <input type="checkbox"/> cohort <input type="checkbox"/> mixed-methods<br><input type="checkbox"/> other: _____ |
| 12. Unit of allocation<br>(part/person/group)                         |                                                                                                                                                          |
| 13. Start date<br>(dd/mm/yy)                                          |                                                                                                                                                          |
| 14. End date<br>(dd/mm/yy)                                            |                                                                                                                                                          |
| 15. Duration of participation<br>(from recruitment to last follow up) |                                                                                                                                                          |
| 16. Ethics approval obtained?                                         | <input type="checkbox"/> yes <input type="checkbox"/> no <input type="checkbox"/> not needed                                                             |
| <b>Notes:</b>                                                         |                                                                                                                                                          |

| Population and setting                                                  |                                                                                              |
|-------------------------------------------------------------------------|----------------------------------------------------------------------------------------------|
| 17. Population description<br>(from which study participants are drawn) |                                                                                              |
| 18. Setting<br>(including location and social context)                  |                                                                                              |
| 19. Specific geographic region                                          |                                                                                              |
| 20. Inclusion criteria                                                  |                                                                                              |
| 21. Exclusion criteria                                                  |                                                                                              |
| 22. Method(s) of participant recruitment                                |                                                                                              |
| 23. Informed consent?                                                   | <input type="checkbox"/> yes <input type="checkbox"/> no <input type="checkbox"/> not needed |

|                      |                                                                                                                                                                        |
|----------------------|------------------------------------------------------------------------------------------------------------------------------------------------------------------------|
| 24. Participants (n) | _____                                                                                                                                                                  |
| 25. Subgroups (n)    | _____ <i>SBA/institutional delivery</i><br>_____ <i>TAB or other non-SBA birth attendant delivery</i><br>_____ <i>Non-institutional delivery</i><br>_____ <i>Other</i> |
| <b>Notes:</b>        |                                                                                                                                                                        |

### Intervention

| <i>Attendants at birth</i>                                |                                                                                                                                                                                                                                                                                                                                                |
|-----------------------------------------------------------|------------------------------------------------------------------------------------------------------------------------------------------------------------------------------------------------------------------------------------------------------------------------------------------------------------------------------------------------|
| 26. SBA cadre included<br>(check all correct answers)     | <input type="checkbox"/> nurse <input type="checkbox"/> nurse-midwife <input type="checkbox"/> clinical officer/physician<br>assistant <input type="checkbox"/> doctor <input type="checkbox"/> unspecified<br><br><input type="checkbox"/> other: _____                                                                                       |
| 27. <b>Details of SBA care</b>                            | Any additional measure (add details to note section below):<br><br><input type="checkbox"/> time spent <input type="checkbox"/> intrapartum care only <input type="checkbox"/> postpartum care<br><br><input type="checkbox"/> quality of care received <input type="checkbox"/> felt respected by<br>SBA <input type="checkbox"/> Other _____ |
| 28. Non-SBA cadre included<br>(check all correct answers) | <input type="checkbox"/> traditional birth attendant <input type="checkbox"/> unspecified<br><br><input type="checkbox"/> other: _____                                                                                                                                                                                                         |
| 29. Facility included<br>(check all correct answers)      | <input type="checkbox"/> birth centre <input type="checkbox"/> health centre <input type="checkbox"/> district/local hospital<br><br><input type="checkbox"/> referral/tertiary hospital <input type="checkbox"/> unspecified<br><br><input type="checkbox"/> other: _____                                                                     |
| <b>Notes:</b>                                             |                                                                                                                                                                                                                                                                                                                                                |

## Outcomes

| Equity/inequity and Results                                                  |                                                                                                                                                                                                                                                                                                                                                                                                                                                                                                                                                                                                                                                                                                                                                                                                                                                                |
|------------------------------------------------------------------------------|----------------------------------------------------------------------------------------------------------------------------------------------------------------------------------------------------------------------------------------------------------------------------------------------------------------------------------------------------------------------------------------------------------------------------------------------------------------------------------------------------------------------------------------------------------------------------------------------------------------------------------------------------------------------------------------------------------------------------------------------------------------------------------------------------------------------------------------------------------------|
| 30. Primary outcome                                                          |                                                                                                                                                                                                                                                                                                                                                                                                                                                                                                                                                                                                                                                                                                                                                                                                                                                                |
| 31. Participant determinants included <sup>1</sup><br>(check all applicable) | <p><input type="checkbox"/> Place of residence:</p> <p><i>Definition/stratification:</i></p> <p><input type="checkbox"/> Urban/rural/humanitarian</p> <p><input type="checkbox"/> Geographic distinction</p> <p><input type="checkbox"/> Transportation access</p> <p><input type="checkbox"/> Road access</p> <p><input type="checkbox"/> Race/Ethnicity/culture/language:</p> <p><i>Definition/stratification:</i></p> <p><input type="checkbox"/> Occupation:</p> <p><i>Definition/stratification:</i></p> <p><u>Gender:</u></p> <p><input type="checkbox"/> Employment in non-agricultural sector</p> <p><input type="checkbox"/> Children &lt;15 years old working</p> <p><input type="checkbox"/> Gender/Sex:</p> <p><i>Definition/stratification:</i></p> <p><u>Gender:</u></p> <p><input type="checkbox"/> Intimate partner violence (recent/ever)</p> |

<sup>1</sup> Adapted from the Progress-Plus framework; O'Neill J, Tabish H, Welch V, Petticrew M, Pottie K, Clarke M, et al. Applying an equity lens to interventions: using PROGRESS ensures consideration of socially stratifying factors to illuminate inequities in health. *J Clin Epidemiol.* 2014;67(1):56-64.

|  |                                                                                                                                                                                                                                                                                                                                                                                                                                                                                                                                                                                                        |
|--|--------------------------------------------------------------------------------------------------------------------------------------------------------------------------------------------------------------------------------------------------------------------------------------------------------------------------------------------------------------------------------------------------------------------------------------------------------------------------------------------------------------------------------------------------------------------------------------------------------|
|  | <input type="checkbox"/> Power differential <ul style="list-style-type: none"> <li><input type="checkbox"/> Acceptability of suggesting condom use, refusing sex</li> <li><input type="checkbox"/> Age difference of sex partner</li> <li><input type="checkbox"/> Decision making about own health</li> </ul> <input type="checkbox"/> Marriage/union <ul style="list-style-type: none"> <li><input type="checkbox"/> choice of spouse</li> <li><input type="checkbox"/> age &lt; 15 years old / &lt; 18 years old</li> </ul> <p><u>Sexual health:</u></p> <input type="checkbox"/> Sex before age 15 |
|  | <input type="checkbox"/> History of sexual violence (recent/ever) and or by age 18 years                                                                                                                                                                                                                                                                                                                                                                                                                                                                                                               |
|  | <input type="checkbox"/> History of female genital cutting                                                                                                                                                                                                                                                                                                                                                                                                                                                                                                                                             |
|  | <p><u>Reproductive/maternal health:</u></p> <input type="checkbox"/> Parity/grand-multiparity                                                                                                                                                                                                                                                                                                                                                                                                                                                                                                          |
|  | <input type="checkbox"/> Adolescent pregnancy                                                                                                                                                                                                                                                                                                                                                                                                                                                                                                                                                          |
|  | <input type="checkbox"/> Obstetrical history <ul style="list-style-type: none"> <li><input type="checkbox"/> self – complications/adverse outcome</li> <li><input type="checkbox"/> other – complications/adverse outcome</li> </ul>                                                                                                                                                                                                                                                                                                                                                                   |
|  | <input type="checkbox"/> Four or more antenatal visits                                                                                                                                                                                                                                                                                                                                                                                                                                                                                                                                                 |
|  | <input type="checkbox"/> Early postnatal/postpartum care (within 2 days)                                                                                                                                                                                                                                                                                                                                                                                                                                                                                                                               |
|  | <input type="checkbox"/> Uterotonic immediately after birth (facility birth)                                                                                                                                                                                                                                                                                                                                                                                                                                                                                                                           |
|  | <input type="checkbox"/> Contraception use                                                                                                                                                                                                                                                                                                                                                                                                                                                                                                                                                             |
|  | <input type="checkbox"/> Religion:                                                                                                                                                                                                                                                                                                                                                                                                                                                                                                                                                                     |
|  | <p><i>Definition/stratification:</i></p>                                                                                                                                                                                                                                                                                                                                                                                                                                                                                                                                                               |
|  | <input type="checkbox"/> Education:                                                                                                                                                                                                                                                                                                                                                                                                                                                                                                                                                                    |
|  | <p><i>Definition/stratification:</i></p>                                                                                                                                                                                                                                                                                                                                                                                                                                                                                                                                                               |

|  |                                                                                                                                                                                                                                                                                                                                                                                                                                                                                                                                                                                                                                                                                                                                                                                                                                                                                                                                                                                                                                                                                                                                                      |
|--|------------------------------------------------------------------------------------------------------------------------------------------------------------------------------------------------------------------------------------------------------------------------------------------------------------------------------------------------------------------------------------------------------------------------------------------------------------------------------------------------------------------------------------------------------------------------------------------------------------------------------------------------------------------------------------------------------------------------------------------------------------------------------------------------------------------------------------------------------------------------------------------------------------------------------------------------------------------------------------------------------------------------------------------------------------------------------------------------------------------------------------------------------|
|  | <p><u>Gender:</u></p> <p><input type="checkbox"/> Primary/secondary/tertiary education</p> <p><input type="checkbox"/> Literacy</p> <p><input type="checkbox"/> Socioeconomic status:</p> <p><i>Definition/stratification:</i></p> <p><input type="checkbox"/> Access to safely managed sanitation services (e.g. hand-washing with water and soap)</p> <p><input type="checkbox"/> Children with stunting &lt; 5 years of age</p> <p><input type="checkbox"/> Primary reliance on clean fuels and technology</p> <p><u>Gender:</u></p> <p><input type="checkbox"/> Ownership (goods/land/bank account)</p> <p><input type="checkbox"/> Technology use (mobile phone/internet/media)</p> <p><input type="checkbox"/> Social capital:</p> <p><i>Definition/stratification:</i></p> <p><input type="checkbox"/> Personal characteristics that attract discrimination:</p> <p><i>Definition/stratification:</i></p> <p><input type="checkbox"/> Young/old age</p> <p><input type="checkbox"/> Orphan</p> <p><input type="checkbox"/> Sex worker</p> <p><input type="checkbox"/> Features of relationships:</p> <p><i>Definition/stratification:</i></p> |
|--|------------------------------------------------------------------------------------------------------------------------------------------------------------------------------------------------------------------------------------------------------------------------------------------------------------------------------------------------------------------------------------------------------------------------------------------------------------------------------------------------------------------------------------------------------------------------------------------------------------------------------------------------------------------------------------------------------------------------------------------------------------------------------------------------------------------------------------------------------------------------------------------------------------------------------------------------------------------------------------------------------------------------------------------------------------------------------------------------------------------------------------------------------|

|                                                                           |                                                                                                                                                                                                                                                                                                                                                                                                                                                                                                                                                                                                                                                                                                                                                                      |
|---------------------------------------------------------------------------|----------------------------------------------------------------------------------------------------------------------------------------------------------------------------------------------------------------------------------------------------------------------------------------------------------------------------------------------------------------------------------------------------------------------------------------------------------------------------------------------------------------------------------------------------------------------------------------------------------------------------------------------------------------------------------------------------------------------------------------------------------------------|
|                                                                           | <p><u>Gender:</u></p> <p><input type="checkbox"/> Single/divorced/widowed</p> <p><input type="checkbox"/> Husband's characteristics (e.g. education, etc.)</p> <p><input type="checkbox"/> Other: _____</p> <p><input type="checkbox"/> Time-dependent relationships:</p> <p><i>Definition/stratification:</i></p> <p><input type="checkbox"/> Pregnant/postpartum/breastfeeding</p> <p><input type="checkbox"/> Humanitarian setting (e.g. refugee, internally displaced person)</p> <p><input type="checkbox"/> Political instability</p> <p><input type="checkbox"/> Other: _____</p> <p><input type="checkbox"/> other: _____</p> <p><i>Definition/stratification:</i></p> <p><input type="checkbox"/> other: _____</p> <p><i>Definition/stratification:</i></p> |
| <p>32. Systematic determinants included (<i>check all applicable</i>)</p> | <p><input type="checkbox"/> Maternal mortality ratio</p> <p><input type="checkbox"/> Maternal cause of death (based on ICD-MM coding)</p> <p><input type="checkbox"/> Maternal death registration</p> <p><input type="checkbox"/> Under-5 mortality rate</p> <p><input type="checkbox"/> Neonatal mortality rate</p> <p><input type="checkbox"/> Proportion of children &lt; 5 years old with registered birth</p>                                                                                                                                                                                                                                                                                                                                                   |



|                                                                                                 |                                                                                                                                                                                                                                                                                                                                                                                                                                                                                                                                                                                                                                                                                                                                                                                                                   |
|-------------------------------------------------------------------------------------------------|-------------------------------------------------------------------------------------------------------------------------------------------------------------------------------------------------------------------------------------------------------------------------------------------------------------------------------------------------------------------------------------------------------------------------------------------------------------------------------------------------------------------------------------------------------------------------------------------------------------------------------------------------------------------------------------------------------------------------------------------------------------------------------------------------------------------|
|                                                                                                 | <input type="checkbox"/> Stillbirth rate<br><input type="checkbox"/> C-section rate<br><input type="checkbox"/> Availability of functional Emergency Obstetric Care facilities<br><input type="checkbox"/> Adolescent mortality rate<br><input type="checkbox"/> Out-of-pocket as a percentage of total health expenditure<br><input type="checkbox"/> Current country health expenditure per capita<br><input type="checkbox"/> Presence of laws/regulations that guarantee SRH care                                                                                                                                                                                                                                                                                                                             |
| 33. Participant determinants that were statistically significant<br>(check all correct answers) | <input type="checkbox"/> Place of residence:<br><i>Definition/stratification:</i><br><div style="margin-left: 40px;"> <input type="checkbox"/> Urban/rural/humanitarian<br/> <input type="checkbox"/> Geographic distinction<br/> <input type="checkbox"/> Transportation access<br/> <input type="checkbox"/> Road access         </div><br><input type="checkbox"/> Race/Ethnicity/culture/language:<br><i>Definition/stratification:</i><br><br><input type="checkbox"/> Occupation:<br><i>Definition/stratification:</i><br><br><u>Gender:</u><br><div style="margin-left: 40px;"> <input type="checkbox"/> Employment in non-agricultural sector<br/> <input type="checkbox"/> Children &lt;15 years old working         </div><br><input type="checkbox"/> Gender/Sex:<br><i>Definition/stratification:</i> |

Gender:

- ☐ Intimate partner violence (recent/ever)
- ☐ Power differential
  - ☐ Acceptability of suggesting condom use, refusing sex
  - ☐ Age difference of sex partner
  - ☐ Decision making about own health
- ☐ Marriage/union
  - ☐ choice of spouse
  - ☐ age < 15 years old / < 18 years old

Sexual health:

- ☐ Sex before age 15
- ☐ History of sexual violence (recent/ever) and or by age 18 years
- ☐ History of female genital cutting

Reproductive/maternal health:

- ☐ Parity/grand-multiparity
- ☐ Adolescent pregnancy
- ☐ Obstetrical history
  - ☐ self – complications/adverse outcome
  - ☐ other – complications/adverse outcome
- ☐ Four or more antenatal visits
- ☐ Early postnatal/postpartum care (within 2 days)
- ☐ Uterotonic immediately after birth (facility birth)
- ☐ Contraception use

☐ Religion:*Definition/stratification:*☐ Education:

|  |                                                                                                                                                                                                                                                                                                                                                                                                                                                                                                                                                                                                                                                                                                                                                                                                                                                                                                                                                                                                                                                                                           |
|--|-------------------------------------------------------------------------------------------------------------------------------------------------------------------------------------------------------------------------------------------------------------------------------------------------------------------------------------------------------------------------------------------------------------------------------------------------------------------------------------------------------------------------------------------------------------------------------------------------------------------------------------------------------------------------------------------------------------------------------------------------------------------------------------------------------------------------------------------------------------------------------------------------------------------------------------------------------------------------------------------------------------------------------------------------------------------------------------------|
|  | <p><i>Definition/stratification:</i></p> <p><u>Gender:</u></p> <p><input type="checkbox"/> Primary/secondary/tertiary education</p> <p><input type="checkbox"/> Literacy</p> <p><input type="checkbox"/> Socioeconomic status:</p> <p><i>Definition/stratification:</i></p> <p><input type="checkbox"/> Access to safely managed sanitation services (e.g. hand-washing with water and soap)</p> <p><input type="checkbox"/> Children with stunting &lt; 5 years of age</p> <p><input type="checkbox"/> Primary reliance on clean fuels and technology</p> <p><u>Gender:</u></p> <p><input type="checkbox"/> Ownership (goods/land/bank account)</p> <p><input type="checkbox"/> Technology use (mobile phone/internet/media)</p> <p><input type="checkbox"/> Social capital:</p> <p><i>Definition/stratification:</i></p> <p><input type="checkbox"/> Personal characteristics that attract discrimination:</p> <p><i>Definition/stratification:</i></p> <p><input type="checkbox"/> Young/old age</p> <p><input type="checkbox"/> Orphan</p> <p><input type="checkbox"/> Sex worker</p> |
|--|-------------------------------------------------------------------------------------------------------------------------------------------------------------------------------------------------------------------------------------------------------------------------------------------------------------------------------------------------------------------------------------------------------------------------------------------------------------------------------------------------------------------------------------------------------------------------------------------------------------------------------------------------------------------------------------------------------------------------------------------------------------------------------------------------------------------------------------------------------------------------------------------------------------------------------------------------------------------------------------------------------------------------------------------------------------------------------------------|

|                                                                                                           |                                                                                                                                                                                                                                                                                                                                                                                                                                                                                                                                                                                                                                                                                                                                                                                                                                                                          |
|-----------------------------------------------------------------------------------------------------------|--------------------------------------------------------------------------------------------------------------------------------------------------------------------------------------------------------------------------------------------------------------------------------------------------------------------------------------------------------------------------------------------------------------------------------------------------------------------------------------------------------------------------------------------------------------------------------------------------------------------------------------------------------------------------------------------------------------------------------------------------------------------------------------------------------------------------------------------------------------------------|
|                                                                                                           | <p><input type="checkbox"/> Features of relationships:</p> <p><i>Definition/stratification:</i></p> <p><u>Gender:</u></p> <p><input type="checkbox"/> Single/divorced/widowed</p> <p><input type="checkbox"/> Husband's characteristics (e.g. education, etc.)</p> <p><input type="checkbox"/> Other: _____</p> <p><input type="checkbox"/> Time-dependent relationships:</p> <p><i>Definition/stratification:</i></p> <p><input type="checkbox"/> Pregnant/postpartum/breastfeeding</p> <p><input type="checkbox"/> Humanitarian setting (e.g. refugee, internally displaced person)</p> <p><input type="checkbox"/> Political instability</p> <p><input type="checkbox"/> Other: _____</p> <p><input type="checkbox"/> other: _____</p> <p><i>Definition/stratification:</i></p> <p><input type="checkbox"/> other: _____</p> <p><i>Definition/stratification:</i></p> |
| <p>34. Systematic determinants that were statistically significant (<i>check all correct answers</i>)</p> | <p><input type="checkbox"/> Maternal mortality ratio</p> <p><input type="checkbox"/> Maternal cause of death (based on ICD-MM coding)</p> <p><input type="checkbox"/> Maternal death registration</p> <p><input type="checkbox"/> Under-5 mortality rate</p> <p><input type="checkbox"/> Neonatal mortality rate</p>                                                                                                                                                                                                                                                                                                                                                                                                                                                                                                                                                     |

|                                            |                                                                                                                                                                                                                                                                                                                                                                                                                                                                                                                                                                              |
|--------------------------------------------|------------------------------------------------------------------------------------------------------------------------------------------------------------------------------------------------------------------------------------------------------------------------------------------------------------------------------------------------------------------------------------------------------------------------------------------------------------------------------------------------------------------------------------------------------------------------------|
|                                            | <input type="checkbox"/> Proportion of children < 5 years old with registered birth<br><input type="checkbox"/> Stillbirth rate<br><input type="checkbox"/> C-section rate<br><input type="checkbox"/> Availability of functional Emergency Obstetric Care facilities<br><input type="checkbox"/> Adolescent mortality rate<br><input type="checkbox"/> Out-of-pocket as a percentage of total health expenditure<br><input type="checkbox"/> Current country health expenditure per capita<br><input type="checkbox"/> Presence of laws/regulations that guarantee SRH care |
| 35. Confounding factors/effect modifiers:  |                                                                                                                                                                                                                                                                                                                                                                                                                                                                                                                                                                              |
| 36. Results<br>(specify, e.g. OR, RR, IRR) |                                                                                                                                                                                                                                                                                                                                                                                                                                                                                                                                                                              |
